# Supplementary material
Source: PubMed Central journal article supplement (PMC4333479)
Supplement: IAI.02876-14_zii999091123so1.pdf [file IAI.02876-14_zii999091123so1.pdf]

**SUPPLEMENTAL DATA****The secreted effector protein EspZ is essential for virulence of rabbit  
enteropathogenic *Escherichia coli***

John Scott Wilbur<sup>1§</sup>, Wyatt Byrd<sup>§5</sup>, Shylaja Ramamurthy<sup>1</sup>, Hannah Ledvina<sup>1</sup>, Khaldoon  
Khirfan<sup>5</sup>, Michael Riggs<sup>1</sup>, Edgar Boedeker<sup>5</sup>, Gayatri Vedantam<sup>1,2,3,4</sup> and V.K.  
Viswanathan<sup>1,2,3\*</sup>

<sup>1</sup>School of Animal & Comparative Biomedical Sciences, <sup>2</sup>Department of Immunobiology,  
<sup>3</sup>The Bio5 Institute for Collaborative Research, University of Arizona, Tucson, AZ, and  
<sup>4</sup>Southern Arizona VA Healthcare System, Tucson, AZ. <sup>5</sup>Division of Gastroenterology,  
University of New Mexico, and the Albuquerque VA Medical Center, Albuquerque, New  
Mexico, USA

15 **Supplemental Table 1. Clinical Observation Scoring**

| <b><u>Parameter</u></b>    | <b><u>Description</u></b>                                                                                                                  | <b><u>Score</u></b> |
|----------------------------|--------------------------------------------------------------------------------------------------------------------------------------------|---------------------|
| 1. Appearance and Behavior | Normal (alert, facing out, olfaction)                                                                                                      | 0                   |
|                            | Minor changes (hypoactivity/restlessness)                                                                                                  | 1                   |
|                            | Lack of grooming, eye/nasal discharge                                                                                                      | 2                   |
|                            | Hunched back, depressed, ataxia                                                                                                            | 3                   |
|                            | Moribund, eyes half closed, pale mucous membranes                                                                                          | 4                   |
| 2. Provoked Behavior       | Normal                                                                                                                                     | 0                   |
|                            | Mild depression to aggression                                                                                                              | 1                   |
|                            | Moderate depression or aggression; weak, less responsive to stimulus; exaggerated respiration                                              | 2                   |
|                            | Unable to respond to mild stimulus                                                                                                         | 3                   |
| 3. Gastrointestinal (GI)   | Normal (normal stool, appetite and drinking)                                                                                               | 0                   |
|                            | Mild (soft or scant stool)                                                                                                                 | 1                   |
|                            | Mild to Moderate (diarrhea, no blood; fecal-stained fur; decreased appetite and/or drinking)                                               | 2                   |
|                            | Moderate (diarrhea with blood; decreased appetite or drinking; gaunt flank)                                                                | 3                   |
|                            | Severe (diarrhea with blood; not eating or drinking; shocky with pale mucous membranes; or boarded abdomen; or tenesmus (rectal prolapse)) | 4                   |
| 4. Body Weight (BW)        | Normal                                                                                                                                     | 0                   |
|                            | ≥ 5% BW Loss                                                                                                                               | 1                   |
|                            | ≥ 10% BW Loss                                                                                                                              | 2                   |
|                            | ≥ 15% BW Loss                                                                                                                              | 3                   |
|                            | ≥ 20% BW loss                                                                                                                              | 4                   |
| Total Score                | 0-18 (> 11 total, high score within any group or level 3 for both BW & GI - requires early end-point euthanasia)                           | 18                  |
